1  
2  
3  
4  
5  
6  
7  
8  
9  
10  
11  
12  
13  
14  
15  
16  
17  
18  
19  
20  
21  
22  
23  
24  
25  
26  
27  
28  
29  
30  
31  
32  
33

## Visual mismatch negativity to disappearing parts of objects and textures

István Czigler<sup>1</sup>, István Sulykos<sup>1</sup>, Domonkos File<sup>1, 2, 3</sup>, Petia Kojouharova<sup>1, 2, 3</sup>, Zsófia Anna Gaál<sup>1</sup>

<sup>1</sup>Institute of Cognitive Neuroscience and Psychology, RCNS, HAS, Budapest, Hungary

<sup>2</sup>Institute of Psychology, Eötvös Loránd University, Budapest, Hungary

<sup>3</sup>Doctoral School of Psychology, Eötvös Loránd University, Budapest, Hungary

Corresponding author: Zsófia Anna Gaál

Institute of Cognitive Neuroscience and Psychology  
Research Centre for Natural Sciences, HAS  
e-mail: [gaal.zsofia.anna@ttk.mta.hu](mailto:gaal.zsofia.anna@ttk.mta.hu)  
Addr.: Research Centre for Natural Sciences  
1519 Budapest, P.O.Box 286, Hungary  
Phone: +36 1 382-6817

34 **Abstract**

35 Visual mismatch negativity (vMMN), an event-related signature of automatic detection of  
36 events violating sequential regularities is traditionally investigated to the onset of frequent  
37 (standard) and rare (deviant) events. In a previous study [4] we obtained vMMN to  
38 vanishing parts of continuously presented objects (diamonds with diagonals), and we  
39 concluded that the offset-related vMMN is a model of sensitivity to irregular partial  
40 occlusion of objects. In the present study we replicated the previous results, but to test the  
41 object-related interpretation we applied a new condition with a set of separate visual  
42 stimuli: a texture of bars with two orientations. In the texture condition (offset of bars with  
43 irregular vs. regular orientation) we obtained vMMN, showing that the continuous presence  
44 of objects is unnecessary for offset-related vMMN. However, unlike in the object-related  
45 condition, reappearance of the previously vanishing lines also elicited vMMN. In a formal  
46 way reappearance of the stimuli is an event with probability 1.0, and according to the  
47 results, object condition reappearance is an expected event. However, offset and onset of  
48 texture elements seems to be treated separately by the system underlying vMMN. As an  
49 advantage of the present method, the whole stimulus set during the inter-stimulus interval  
50 saturates the visual structures sensitive to stimulus input. Accordingly, the offset-related  
51 vMMN is less sensitive to low-level adaptation difference between the deviant and standard  
52 stimuli.

53

54 **Keywords:** Visual mismatch negativity, object and texture, offset and onset events

55

56 **1. Introduction**

57

58           The visual information processing system is sensitive to events violating the  
59 regularity of stimulus sequences, even if the events are unrelated to the ongoing task  
60 (unattended). The automatic detection of violating regularities can be revealed by the visual  
61 mismatch negativity (vMMN) components of event-related brain potentials (ERPs). VMMN  
62 is the difference between the ERPs elicited by the deviant events and the ERPs to the  
63 regular ones. VMMN is elicited by deviant visual features (color, orientation, movement  
64 direction, etc.), object-related deviancies, facial emotions, handedness, numerosity,  
65 sequential regularities, familiarity, language-related and other deviances, etc. (for reviews  
66 see [1, 2, 3]).

67           In our previous study [4] we obtained vMMN to the offset of irregularly vanishing  
68 part of objects. In particular, diamonds with diameters were presented during the inter-  
69 event interval. From time to time two parallel sides of the diamonds disappeared. One of  
70 the parallel sides disappeared infrequently, the other pair disappeared frequently.  
71 Importantly, diamonds were unrelated to the ongoing tracking task. VMMN, as a difference  
72 potential between those elicited by the infrequent and frequent offset emerged over the  
73 occipital location within the 120-202 ms range. However, no vMMN appeared after the  
74 reappearance of the whole object. We interpreted our result as showing that the infrequent  
75 occlusion of the represented objects elicited vMMN, whereas the reappearance of the  
76 object was a predicted event, and accordingly these events did not elicit vMMN. This  
77 interpretation is in accord with a prevailing theory of auditory MMN and vMMN. The  
78 predictive coding theory considers the mismatch potentials as errors signals. The memory  
79 representation of the frequent (standard) stimuli generates an expectation about the likely

80 properties of future events. In case of match between the input and the expected  
81 representation (i.e., without new information) the perceptual system may ignore event.  
82 Further processing only occurs when there is discrepancy between the input and the  
83 expectancy. The mismatch components are signatures of the mutual adjustment between  
84 the input and the expected events only. According to the predictive coding view,  
85 reappearance of the whole pattern (i.e. an event with 1.0 probability) does not elicit vMMN  
86 [2, 3, 5, 6]. Furthermore, this interpretation of the previous study [4] was closely connected  
87 to object-related representation, because we considered that the environmental model  
88 consisted of the representation of the whole diamonds. The aim of the present study was to  
89 replicate this result, and investigate the object-related aspect of our interpretation. On this  
90 end beside the object-related condition, in the inter-event period we presented  
91 unconnected bars with two orientations (texture condition). One set of bars with a  
92 particular orientation vanished infrequently, the other frequently. We hypothesized, that  
93 without the object-related representation stimulus offset does not elicit vMMN, but  
94 stimulus onset, as an orientation-related deviancy elicits vMMN.

95         It is important to note that the offset stimulation has a particular advantage. While  
96 the stimuli are present during the inter-event interval, these stimuli saturate the low-level  
97 input structures. Therefore the ERPs to deviant vs. standard difference are less susceptible  
98 to stimulus-specific adaptation, therefore offset-related vMMN can be considered as  
99 deviant-related additional activity (genuine vMMN; [7, 8]).

100

## 101 **2. Materials and methods**

102

### 103 **2.1. Participants**

104

105           Twenty adults participated in the study. All of them had normal or corrected-to-  
106 normal vision (at least 5/5 in a version of the Snellen charts). No one reported any  
107 neurological or psychiatric diseases. They were paid for their participation. One of the  
108 participants had an unusually noisy ERP, and another participant's ERP was dominated by  
109 alpha activity. Therefore, the results were calculated for the remaining 18 participants (10  
110 females, mean age: 22.1 years, SD: 2.3 years). Participants were paid for their contributions.  
111 Written informed consent was obtained from the participants before the experimental  
112 procedure. The study was approved by the United Ethical Review Committee for Research in  
113 Psychology (Hungary).

114

## 115 **2.2. Stimuli and procedure**

116

117           The experimental stimuli of the object condition and other aspects of the study were  
118 identical to our previous study [4]. As a summary, events were presented on a 19-in CRT  
119 monitor (Flatron 915 FT Plus, 75 Hz refresh rate) from a 1.4 m distance using the Cogent  
120 2000 MATLAB toolbox. Figure 1 demonstrates the task-related and vMMN-related stimuli in  
121 the two conditions and the stimulus sequence.

122

123           Insert Figure 1 about here

124

125           The task-relevant stimuli appeared on the central area of the screen and consisted of  
126 two disks. The red disk served as a fixation point, the green disk made horizontal random  
127 motion around the red disk. The task was to keep the green disk as close to the center of

128 the red disk as possible with the left and right arrows of a keyboard. Error occurred when  
129 the distance of the two disks exceeded 1.1 degrees. Performance (the sum of errors in one  
130 block) was reported on the screen at the end of each block. Behavioral data were defined as  
131 the number of occasions when the ball left the target area. The performance of the two  
132 conditions was compared in a t-test.

133 The vMMN-related irrelevant stimuli appeared around the task-relevant stimuli. In  
134 the *Object condition*, diamonds and diamonds without two of their parallel lines appeared  
135 alternately. Six identical objects (75.5 cd/m<sup>2</sup>) were presented (in a 2 row by 3 against a  
136 medium-gray background (20.1 cd/m<sup>2</sup>). There was no inter-stimulus interval between these  
137 patterns. In the offset events either the two 45-degree sides or the two 135-degree sides of  
138 the diamonds were omitted. These two patterns were presented in oddball sequences, with  
139 either the left-tilted or the right-tilted version as deviant ( $p=0.2$ ). In one block there were 95  
140 offset events, 76 standard bow ties, and 19 deviant ones. According to the reverse control  
141 principle, both the left- and right-tilted bow ties served as deviant and standard (6  
142 sequences for each). Altogether, 570 stimuli were presented in each deviant-standard  
143 direction. The stimulus duration of all three patterns was 520 ms (with +/- 40 ms jitter in  
144 13.3 ms steps).

145 In the *Text condition*, there were oblique lines with 45-degree and 135-degree  
146 orientations. The lines were randomly dispersed within the stimulus field, but the number  
147 of tilted lines, the size of the lines and the luminances were equal to those in the *Object*  
148 condition, and in all other respects, the two conditions were identical. Figure 1A  
149 demonstrates the screen of task-related and vMMN-related stimuli in the two conditions,  
150 and Figure 1B shows the stimulus sequence.

151

### 152 **2.3. EEG recording, ERP acquisition and measurement**

153

154 EEG was recorded with a Neuroscan recording system (SynampsRT amplifier,  
155 Compumedics Abbotsford Ltd, Australia, EasyCap, Advanced Medical Equipments Ltd,  
156 Horsham, UK; Ag/AgCl electrodes, DC-200 Hz, sampling rate: 1000 Hz). Thirty-eight  
157 electrode locations were used, in accordance with the extended 10–20 system. The ground  
158 electrode was placed on the forehead. An electrode on the tip of the nose served as a  
159 reference. HEOG and VEOG were recorded with bipolar configurations between two  
160 electrodes placed laterally to the outer canthi of the two eyes or above and below the left  
161 eye, respectively.

162 The EEG signal was analyzed with a MATLAB script developed in our lab. First, it was  
163 filtered offline with a noncausal Kaiser-windowed finite impulse response filter (low pass:  
164 30; high-pass: 0.1 Hz). Epochs of 600 ms (including 100 ms prestimulus interval serving as  
165 baseline) were extracted for all deviants and for those standards that immediately preceded  
166 the deviants. Epochs with larger than 100  $\mu$ V or smaller than 2  $\mu$ V voltage change were  
167 considered artifacts and rejected from the further processing. ERPs were calculated by  
168 averaging the extracted epochs. According to the reverse control principle, epochs from  
169 both experimental (oddball and reverse) sequences were entered into the averaging  
170 process.

171 Event-related potentials were averaged separately for the two conditions (object  
172 and text), and within the conditions for the two events (offset and onset) and for the two  
173 probabilities (deviant, standard). Only those ERPs to the standard stimuli were included in  
174 the averaging that appeared before a deviant. The number of averaged epochs was 3828  
175 and 3827 for deviants and last standards which is 84% of all epochs.

176 On the basis of the results of our previous study [4] we calculated an occipital ROI  
177 (O1, Oz, O2) from the deviant minus standard difference potentials. In the previous study  
178 vMMN emerged at the occipital locations within the 220-202 ms range, therefore in the  
179 present study we calculated the mean activity within this range. VMMN amplitudes were  
180 compared in a two-way ANOVA with factors of *Condition* (object, texture) and *Event* (offset,  
181 onset).

182 To control the reliability of difference between the ERPs to the deviant and standard,  
183 within the possible vMMN range we calculated series of t-tests over the 100-300 ms range  
184 at O1, Oz and O2 electrodes on the deviant minus standard difference potentials (difference  
185 from zero). As a criterion of 25 consecutive t-values (25 ms) were significant ( $p < 0.05$ ) at  
186 least over two locations. We obtained significant values within 116-178 ms, 139-195 ms and  
187 155-208 ms ranges (i.e., 62 ms, 56 ms and 53 ms) for object offset, texture offset and  
188 texture onset, respectively.

189 As unexpected findings, in comparison to the standard stimuli, following vMMN,  
190 both offset and onset deviants elicited posterior positivity. Furthermore, over the anterior  
191 locations positive difference potentials emerged, and these positivities were larger for the  
192 offset stimuli. We measured the peak latency and the amplitude values of these positive  
193 differences in the posterior and anterior ROIs (O1, Oz, O2 and F3, Fz and F4, respectively).  
194 Latencies were measured as the largest positive component within 200-300 ms, and  
195 amplitudes were measured as the mean activity of this range. These measures were  
196 analysed in ANOVAs with factors of *Condition* (object, text) and *Event* (offset, onset).

197 To compare the ERPs to stimulus onset and offset on the exogenous activity, we  
198 measured the latencies and amplitudes of the posterior exogenous negative component  
199 (N1) on the occipital ROI (O1, Oz, O2). N1 component was identified in the 120-200 ms



200 window as the highest negative-going deflection, and its latency was measured on the  
201 standard stimuli. Amplitudes were measured as the means of a +/- 5 ms range around the  
202 group average. The amplitudes and latencies were compared in ANOVAs with factors of  
203 *Condition* (object, texture) and *Events* (offset, onset). In the ANOVAs effect size was  
204 calculated as partial eta squared ( $\eta_p^2$ ).

205

### 206 **3. Results**

207

#### 208 **3.1. Behavioral results**

209

210 Performance (errors) was characterized by the number of cases when the distance of  
211 the two discs exceeded 1.1 deg. Performance was fairly high, and the group average of  
212 errors were 5.56 (SD=1.97) and 7.17 (SD=4.23) in the object and texture conditions,  
213 respectively. In a t-test, the difference was not significant.

214

#### 215 **3. 2. Event-related potentials**

216

217 As Figure 2 and 3 shows, deviant object offset, texture offset and texture onset  
218 elicited a negative deviant minus standard posterior difference potential, but object onset  
219 did not elicit posterior negativity. To replicate the results [4] we calculated vMMN  
220 amplitude within the range of significant difference of the previous study (120-202 ms). In  
221 an ANOVA with factors of *Condition* and *Event*. We obtained significant main effect of *Event*,  
222  $F(1,17)=5.23$ ,  $p=0.035$ ,  $\eta_p^2=0.24$ , and interaction  $F[1,17]=73.28$ ,  $p=0.029$ ,  $\eta_p^2=0.25$ .  
223 Following the negative difference potentials, for the deviant offset events positivities

224 emerged over the posterior and anterior locations within the 200-300 ms range (Table 1).  
225 We conducted separate ANOVAs for the posterior (O1, Oz, O2) and anterior (F3, Fz, F4) ROIs  
226 with factors of *Condition* and *Event*. According to the ANOVA the main effect of *Event* was  
227 significant,  $F(1,17)=8.39$ ,  $p=0.010$ ,  $\eta_p^2=0.33$ . In a similar ANOVA for the anterior positivity  
228 the main effect of *Event* was also significant,  $F(1,17)=8.26$ ,  $p=0.011$ ,  $\eta_p^2=0.30$ . Table 1 shows  
229 the amplitude values of the negativity.

230

231 Insert Figures 2 and 3 about here

232

233 As Figures 2 and 3 show, positive difference potentials emerged over the posterior  
234 and anterior locations. To explore the appearance of the positivities in the two conditions to  
235 the two events, we conducted ANOVAs on the mean amplitudes within the 200-300 ms  
236 latency range. For both ROIs the *Event* main effect was significant:  $F(1,17)=8.38$ ,  $p=0.010$ ,  
237  $\eta_p^2=0.33$  for the occipital (O1, Oz, O2) ROI,  $F(1,17)=9.75$ ,  $p=0.010$ ,  $\eta_p^2=0.33$  and  
238  $F(1,17)=8.26$ ,  $p=0.011$ ,  $\eta_p^2=0.30$  for the anterior ROI (F3, Fz, F4), respectively, indicating  
239 larger positivity to the offset events.

240 To compare the ERPs in the texture and object conditions to the onset and offset  
241 events, ANOVAs with factors of *Condition* and *Event* were calculated for the peak latency  
242 and the mean amplitude values (+/- 5 ms around the group average). Latency values were  
243 fairly similar, 160 ms, 157 ms, 158 ms and 162 ms for object offset, object onset, texture  
244 offset and texture onset, respectively. Accordingly, neither the main effects, nor the  
245 interaction were significant. As Table 1 shows, onset events elicited larger N1 than offset  
246 events. In the ANOVA the *Condition* main effect was significant,  $F(1,17)=22.31$ ,  $p<0.001$ ,

247  $\eta_p^2=0.57$ . According to the significant interaction,  $F(1,17)=20.71$ ,  $p<0.001$ ,  $\eta_p^2=0.55$ , the  
248 difference was due to the larger N1 to the object onset.

249

250 Insert Table 1 about here

251

#### 252 **4. Discussion**

253

254 On the basis of the object-related representation of environmental events coding we  
255 expected vMMN to object offset, but we were uncertain whether the offset of visual  
256 textures elicit vMMN. Furthermore, we expected no onset-related vMMN with object onset  
257 deviancy. According to the results both object and texture offset elicited vMMN. Concerning  
258 the reappearance of objects there were no detectable ERP difference between the onset  
259 after the frequently and infrequently vanishing lines of the diamonds. In other words, in the  
260 object condition we did not register vMMN. This result replicated our previous finding [4].  
261 However, emergence of vMMN to texture offset and onset requires the revision of the view  
262 suggested by Sulykos and colleagues [4]. We claimed that the memory system underlying  
263 vMMN represented objects as wholes (Gestalts), and in the study the offset stimuli was a  
264 model of partial occlusion. Therefore vMMN emerged when frequent occlusions were  
265 replaced by rare ones. Furthermore, reappearance of the object, irrespective of the  
266 previous (deviant or standard) offset was a fully predictable event, therefore this event did  
267 not elicit vMMN. However, as the offset-related vMMN of the texture condition of the  
268 present study shows, vanishing of particular bar orientations were sufficient for eliciting  
269 vMMN. Importantly, there was an obvious difference between the object and texture  
270 conditions, i.e., appearance of onset-related vMMN in texture condition. To preserve an

271 aspect of the object-related representation, we claim that in the object condition the  
272 system underlying vMMN treated the offset and onset events as units (disappearance and  
273 reappearance of parts of the objects). However, the system underlying vMMN treats  
274 texture offset and onset separately, i.e., rare vs. frequent offset of particular line  
275 orientations, and rare vs. frequent onset of particular line orientations. In other words,  
276 whereas the representation of the object survived the offset period, texture onset and  
277 offset were treated as separate events. This explanation preserves the notion that vMMN is  
278 a surprise-related component elicited by non-reinforced predictions [e.g. 4, 9, 10, 11, 12, 13,  
279 14], even if in a formal sense, onset is a fully expected event in both conditions.

280         Posterior positivity following the vMMN appeared in previous studies [16, 17]. In the  
281 present study this positivity appeared only to the offset events. Similarly, anterior positivity  
282 appeared in some studies [7, 18] to deviant stimuli. However, connection of these  
283 positivities to the processes underlying vMMN and their functional significance is unclear.  
284 Furthermore, some recent studies reported positive mismatch responses emerged in later  
285 latency ranges [9, 19]. Due to the lack of a priory expectation, as a speculative explanation,  
286 the positivities are connected to a further processing of the more salient offset stimulation;  
287 in this case anterior structures are involved in the processing of deviant events. The  
288 predictive coding view [5] is capable of explain these ERP effects as a modification of the  
289 environmental model. However, relations between vMMN and the subsequent positivities  
290 require further research.

291         Onset events usually elicit ERPs with larger amplitudes than offset events [20, 21].  
292 We obtained similar results. Onset-related N1 was larger in the object condition. While the  
293 reappearing bars were similar in the two conditions, we have no post-hoc explanation for  
294 this unexpected result.

295 In conclusion, offset stimuli after a longer onset period potentially saturated the  
296 input-related visual structures. However, infrequently vanishing stimulus elements elicited  
297 the signature of automatic deviance detection, the visual mismatch negativity. In  
298 comparison, to textures consisted of unconnected bars the memory system underlying  
299 vMMN predicted the reappearance of Gestalt-like stimuli (objects), and stimulus onset of  
300 the objects did not elicit vMMN. As a tentative suggestion, in a visual scene disappearance  
301 can be a more salient event than reappearance, and the more salient event may lead to  
302 further processing, as indicated by both posterior and anterior activity.

303

#### 304 **Acknowledgments**

305 This research was supported by National Research, Development and Innovation Office  
306 (NKFIH), Grant 119587.

307

#### 308 **References**

309 [1] Kremláček J., Kreegipuu K, Tales A, Astikainen P, Pöldver N, Näätänen R, Stefanics G.  
310 Visual mismatch negativity (vMMN): A review and meta-analysis of studies in psychiatric and  
311 neurological disorders. *Cortex*. 2016; 80: 76-112.

312

313 [2] Stefanics G, Astikainen P, Czigler I. Visual mismatch negativity (vMMN): a prediction error  
314 signal in the visual modality. *Front. Hum. Neurosci.* 2015; 8, 1074.

315

316 [3] Stefanics G, Kremláček J, Czigler I. Visual mismatch negativity: A predicting coding view.  
317 *Front. Hum. Neurosci.* 2014; 8, 666.

318

319 [4] Sulykos I, Gaál Zs. A, Czigler, I. Visual mismatch negativity to vanishing parts of objects in  
320 younger and older adults. *Plos One*, 2017; 12, e0188928.

321

322 [5] Friston K. A theory of cortical responses. *Philosophical Transactions of the Royal Society*  
323 *B: Biological Sciences*, 2005; 360, 815-836.

324

325 [6] Winkler, I. Interpreting the mismatch negativity. *Journal of Psychophysiology* 2007:  
326 21 147-163.

327

- 328 [7] Czigler I, Balázs, L, Winkler I. Memory-based detection of task-irrelevant visual changes.  
329 Psychophysiology 2002: 39: 869-873.  
330
- 331 [8] Kimura M, Katayama J, Ohira H, Schröger E. Visual mismatch negativity: New evidence  
332 from the equiprobable paradigm. Psychophysiology 2009: 46: 402-409.  
333
- 334 [9] Amado S, Kovacs G. Does surprise enhancement or repetition suppression explain visual  
335 mismatch negativity? European Journal of Neuroscience 2016: 43: 1590-1600.  
336
- 337 [10] Czigler I, Winkler I. Evidence from auditory and visual event-related potential (ERP)  
338 studies of deviance detection (MMN and vMMN) linking predictive coding theories and  
339 perceptual object representations. International Journal of Psychophysiology 2012: 83: 132-  
340 143.  
341
- 342 [11] Garrido MI, Kilner JM, Stephan KE, Friston KJ. The mismatch negativity: A review of  
343 underlying mechanisms. Clin. Neurophysiol. 2008: 120: 453-463.  
344
- 345 [12] Kimura M, Takeda Y. Automatic prediction regarding the next state of a visual object:  
346 Electrophysiological indicators of prediction match and mismatch. Brain Research 2015:  
347 1626: 31-41.  
348
- 349 [13] Sel A, Harding R, Tsakiris. M. Electrophysiological correlates of self-specific prediction  
350 errors in the human brain. Neuroimage, 2015: 125: 13-24.  
351
- 352 [14] Wacongne, C, Changeux, J.-P, Dehaene, S. A Neuronal Model of Predictive Coding  
353 Accounting for the Mismatch Negativity. J. Neurosci. 2012: 32: 3665-3678.  
354
- 355 [15] Winkler I, Czigler I, Sussman E, Horvath J, Balazs L. Preattentive binding of auditory and  
356 visual stimulus features. J. Cogn. Neurosci. 2005: 17: 320-339.  
357
- 358 [16] File, D, Sulykos I, Czigler, I. Automatic change detection and spatial attention: A visual  
359 mismatch negativity study. Eur. J. Neurosci. 2018 First published: 15 May.  
360
- 361 [17] Heslenfeld DJ. Visual Mismatch Negativity. In: Polich J. (eds) Detection of Change.  
362 Springer, Boston, MA, 2003: 41-59.  
363
- 364 [18] Amado S, Stoyanova P, Kovacs G. Visual mismatch responses and fMRI signal adaptation  
365 correlate in the occipital-temporal cortex. Behav. Brain Res. 2016: 347: 77-87.  
366
- 367 [19] Jeffreys, D.A. Component analysis of transient pattern VEPs. in: H Spekreijse, L.H van der  
368 Tweel (Eds.) Spatial Contrast, Report of a Workshop. North-Holland Publ, Amsterdam;  
369 1977:80-84.  
370
- 371 [20] Shawkat FS, Kriss A. Effects of experimental scotomata on sequential pattern-onset,  
372 pattern-reversal and pattern-offset visual evoked potentials. Doc. Ophthalmol. 1997: 94: 307-  
373 320.  
374

375 **Table**

376

377 **Table 1.** Amplitude values ( $\mu\text{V}$ ) of the posterior negative difference potential (vMMN), the  
378 positive and anterior positivities and the N1 components (standard error of mean in  
379 parenthesis).

380

|                      | range (ms) | object offset | object onset | texture offset | texture offset |
|----------------------|------------|---------------|--------------|----------------|----------------|
| posterior negativity | 120-202    | -1.02 (0.35)  | 0.17 (0.32)  | -0.76 (0.38)   | -0.41 (0.30)   |
| posterior positivity | 200-300    | 0.50 (0.23)   | 0.10 (0.30)  | 0.47 (0.34)    | -0.59 (0.33)   |
| anterior positivity  | 200-300    | 0.93 (0.21)   | 0.04 (0.27)  | 0.60 (0.23)    | 0.15 (0.22)    |
| N1                   | 150-156    | -3.74 (0.48)  | -1.77 (0.33) | -2.69 (0.37)   | -1.96 (0.34)   |

381

382

383 **Figure legends**

384

385 **Figure 1.** Stimuli and stimulus sequences in the texture and object conditions. A: An  
386 example of the stimulus field. The vanishing stimuli were either the 45° or the 135° bars.  
387 Both orientations were standard and deviant. B: the outline of the stimulus sequences (in  
388 both the onset and offset stimuli a +/- 40 ms range was presented around the 520 ms mean  
389 value). The green and red dots are the stimuli of the tracking task.

390

391 **Figure 2.** Event-related potentials and difference potentials at the posterior (occipital) ROI to  
392 stimulus offset and onset events in the Object and Texture conditions. The scalp distributions are  
393 calculated for the ranges with significant deviant minus standard differences.

394

395 **Figure 3.** Event-related potentials and difference potentials at the anterior (frontal) ROI to stimulus  
396 offset and onset events in the Object and Texture conditions. The scalp distributions are calculated  
397 for the ranges with significant deviant minus standard differences.



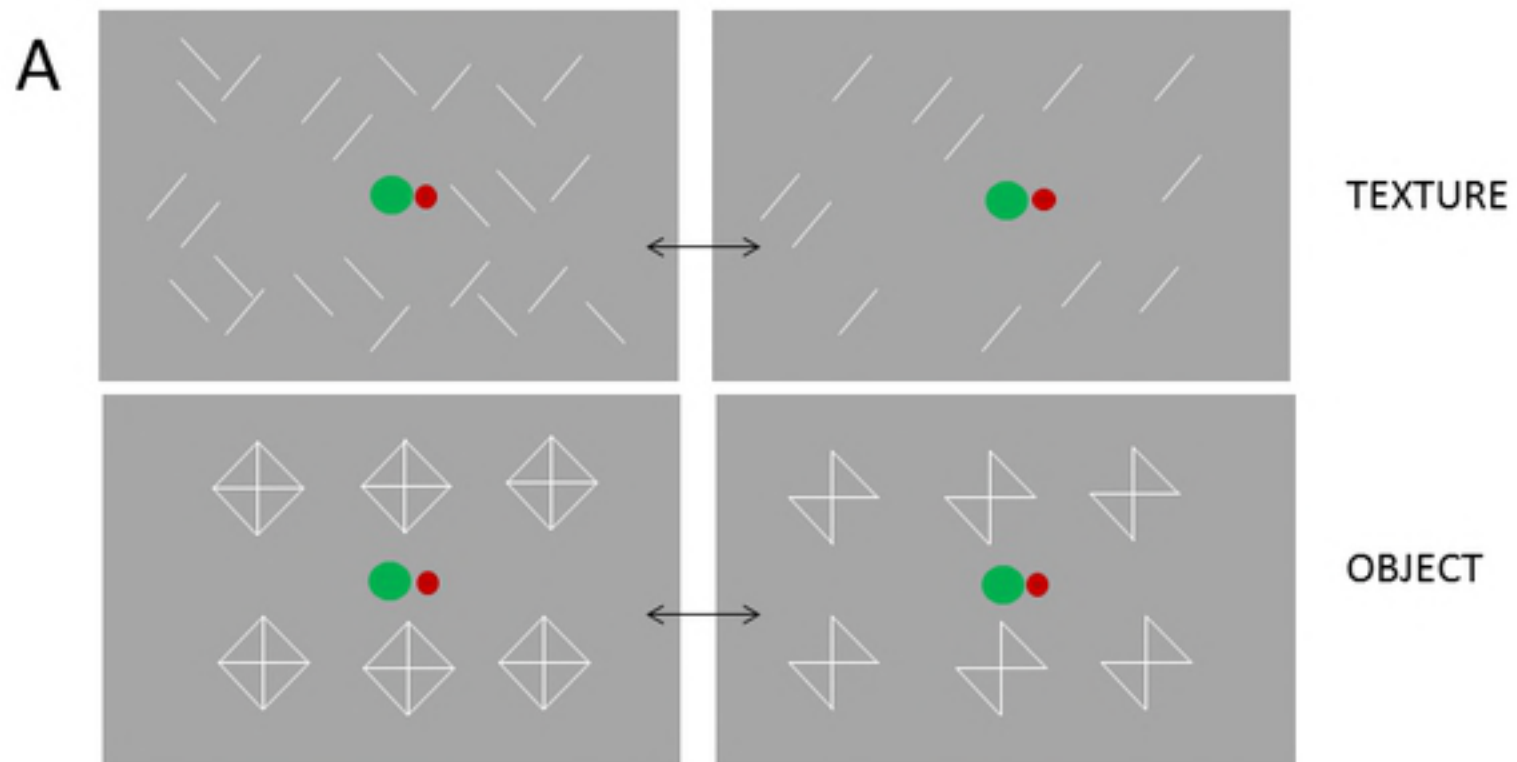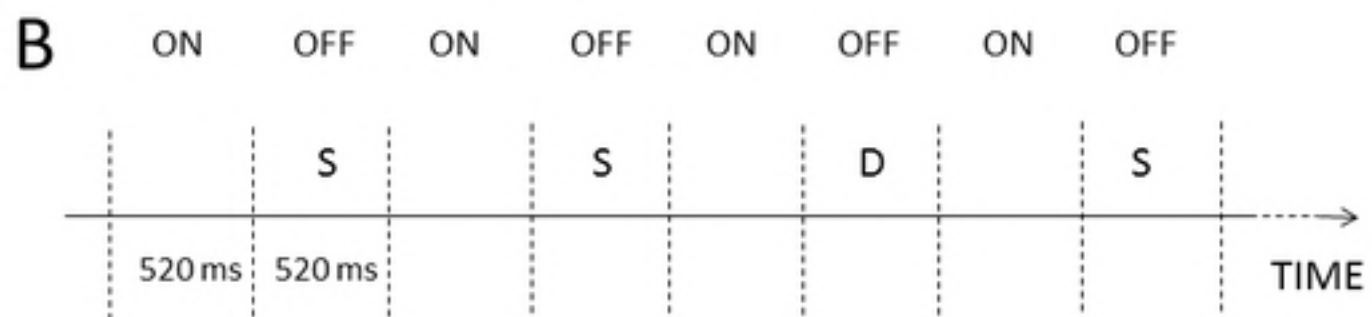

Figure 1

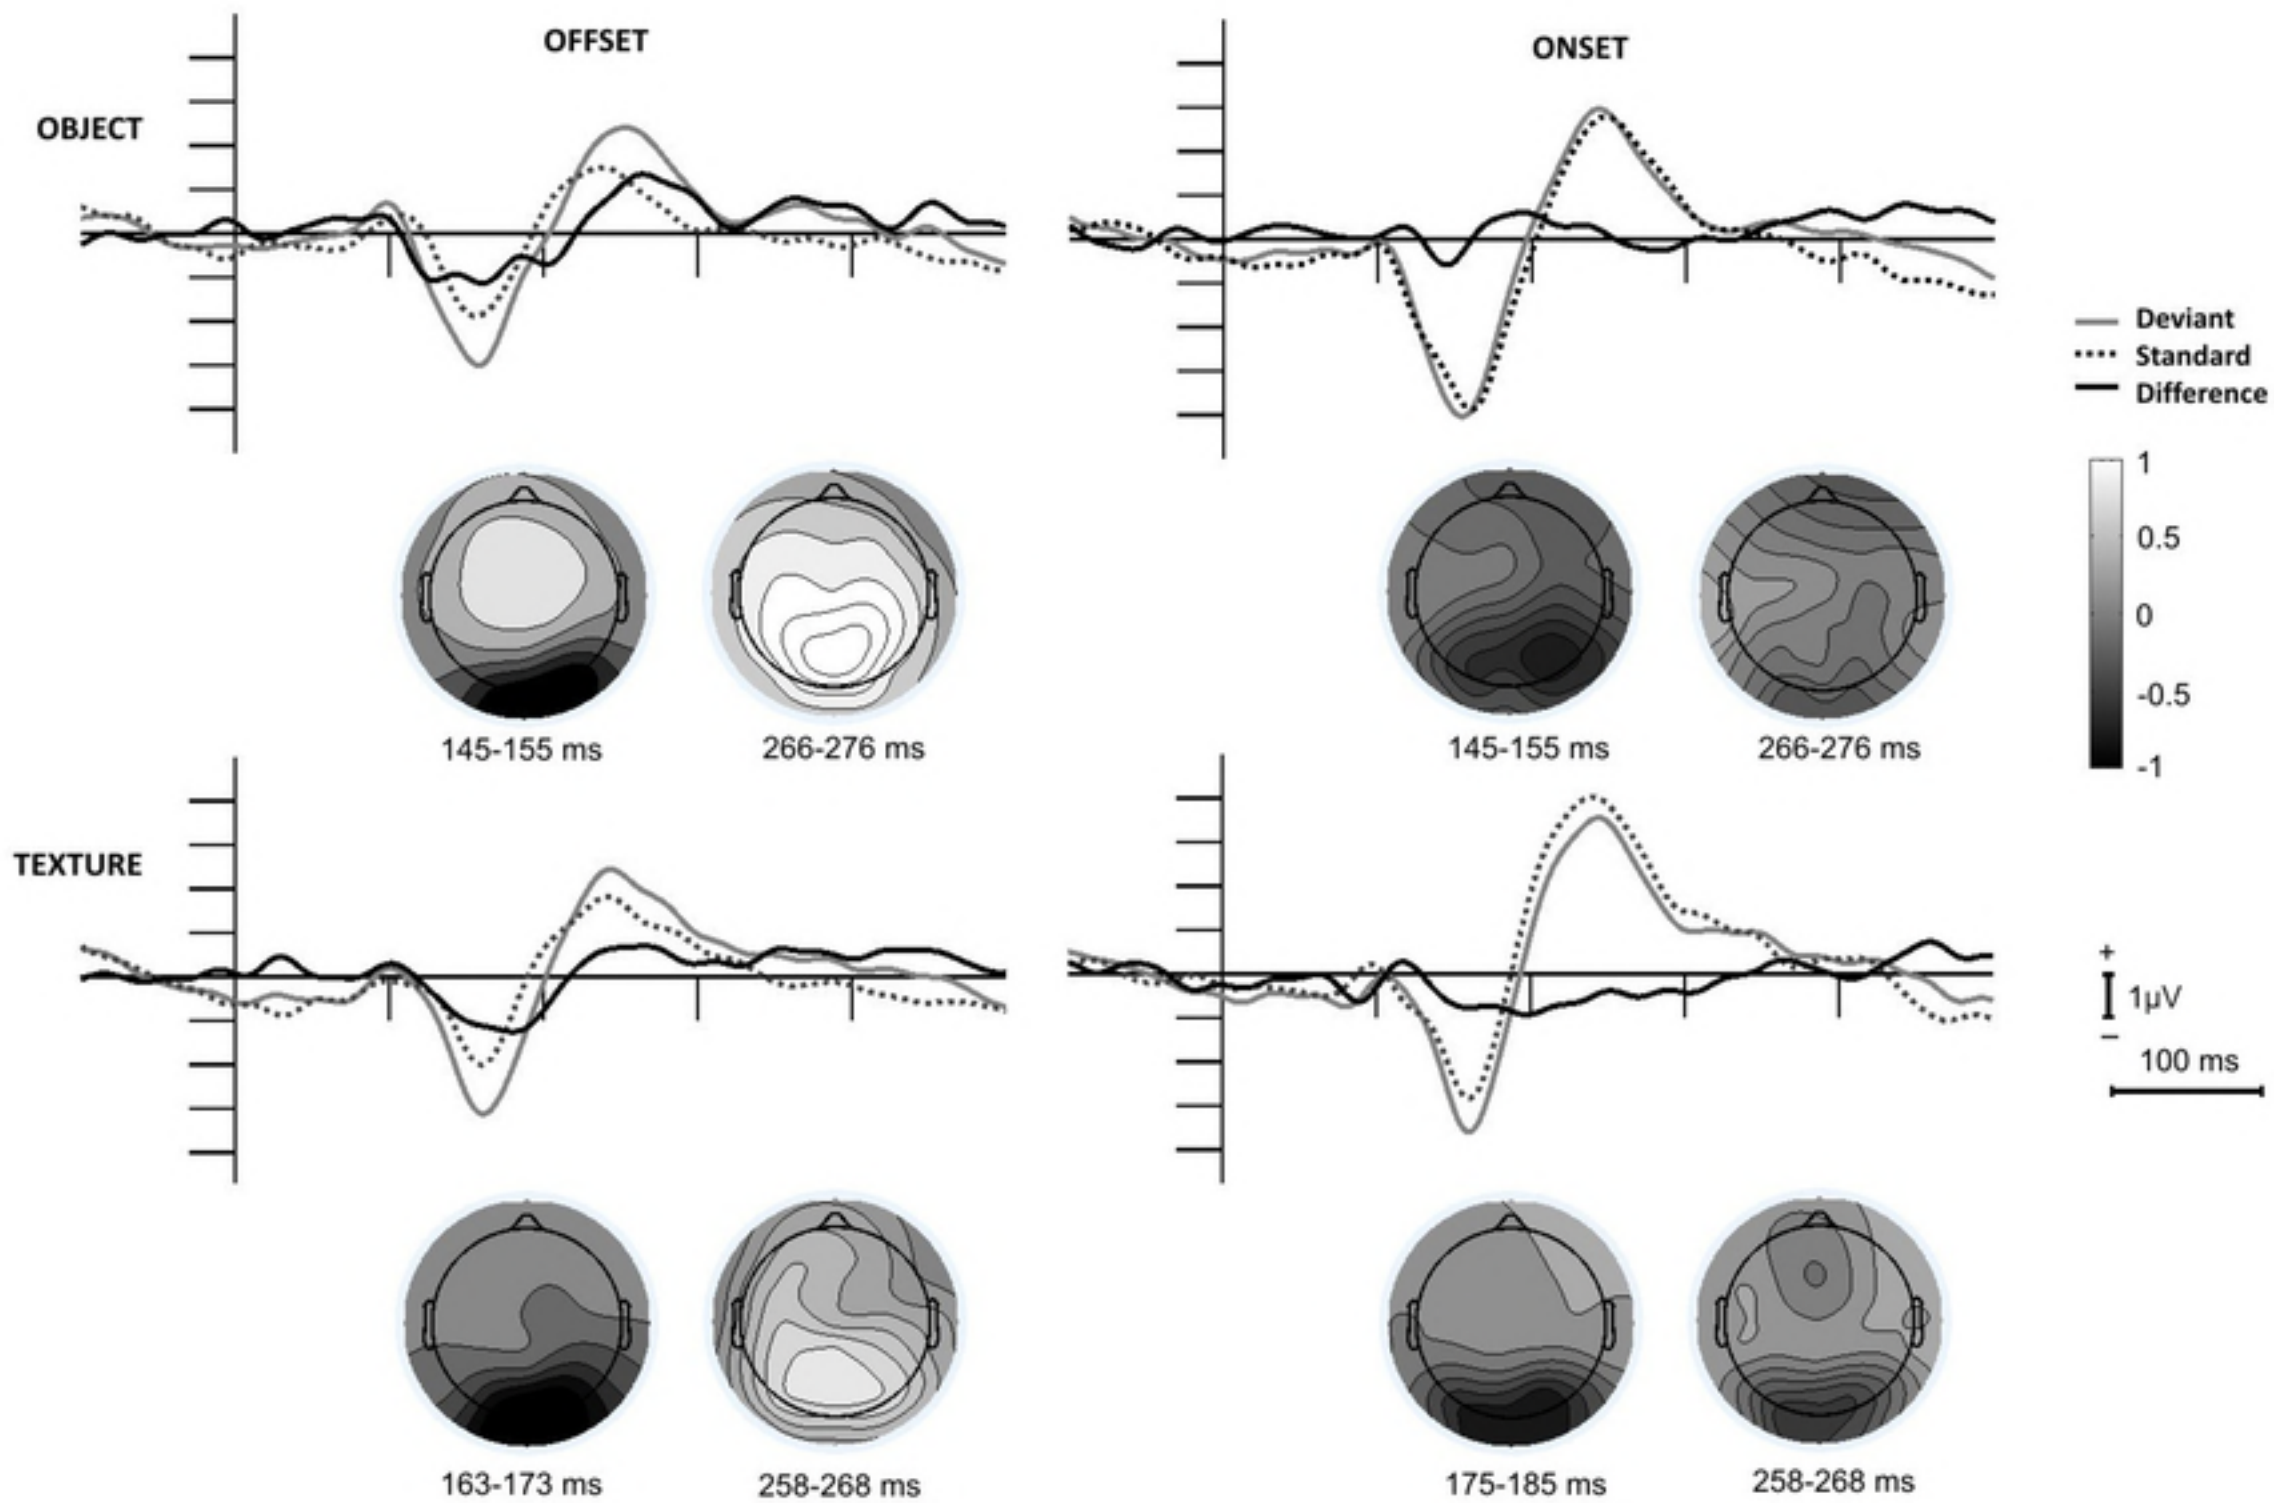

Figure2

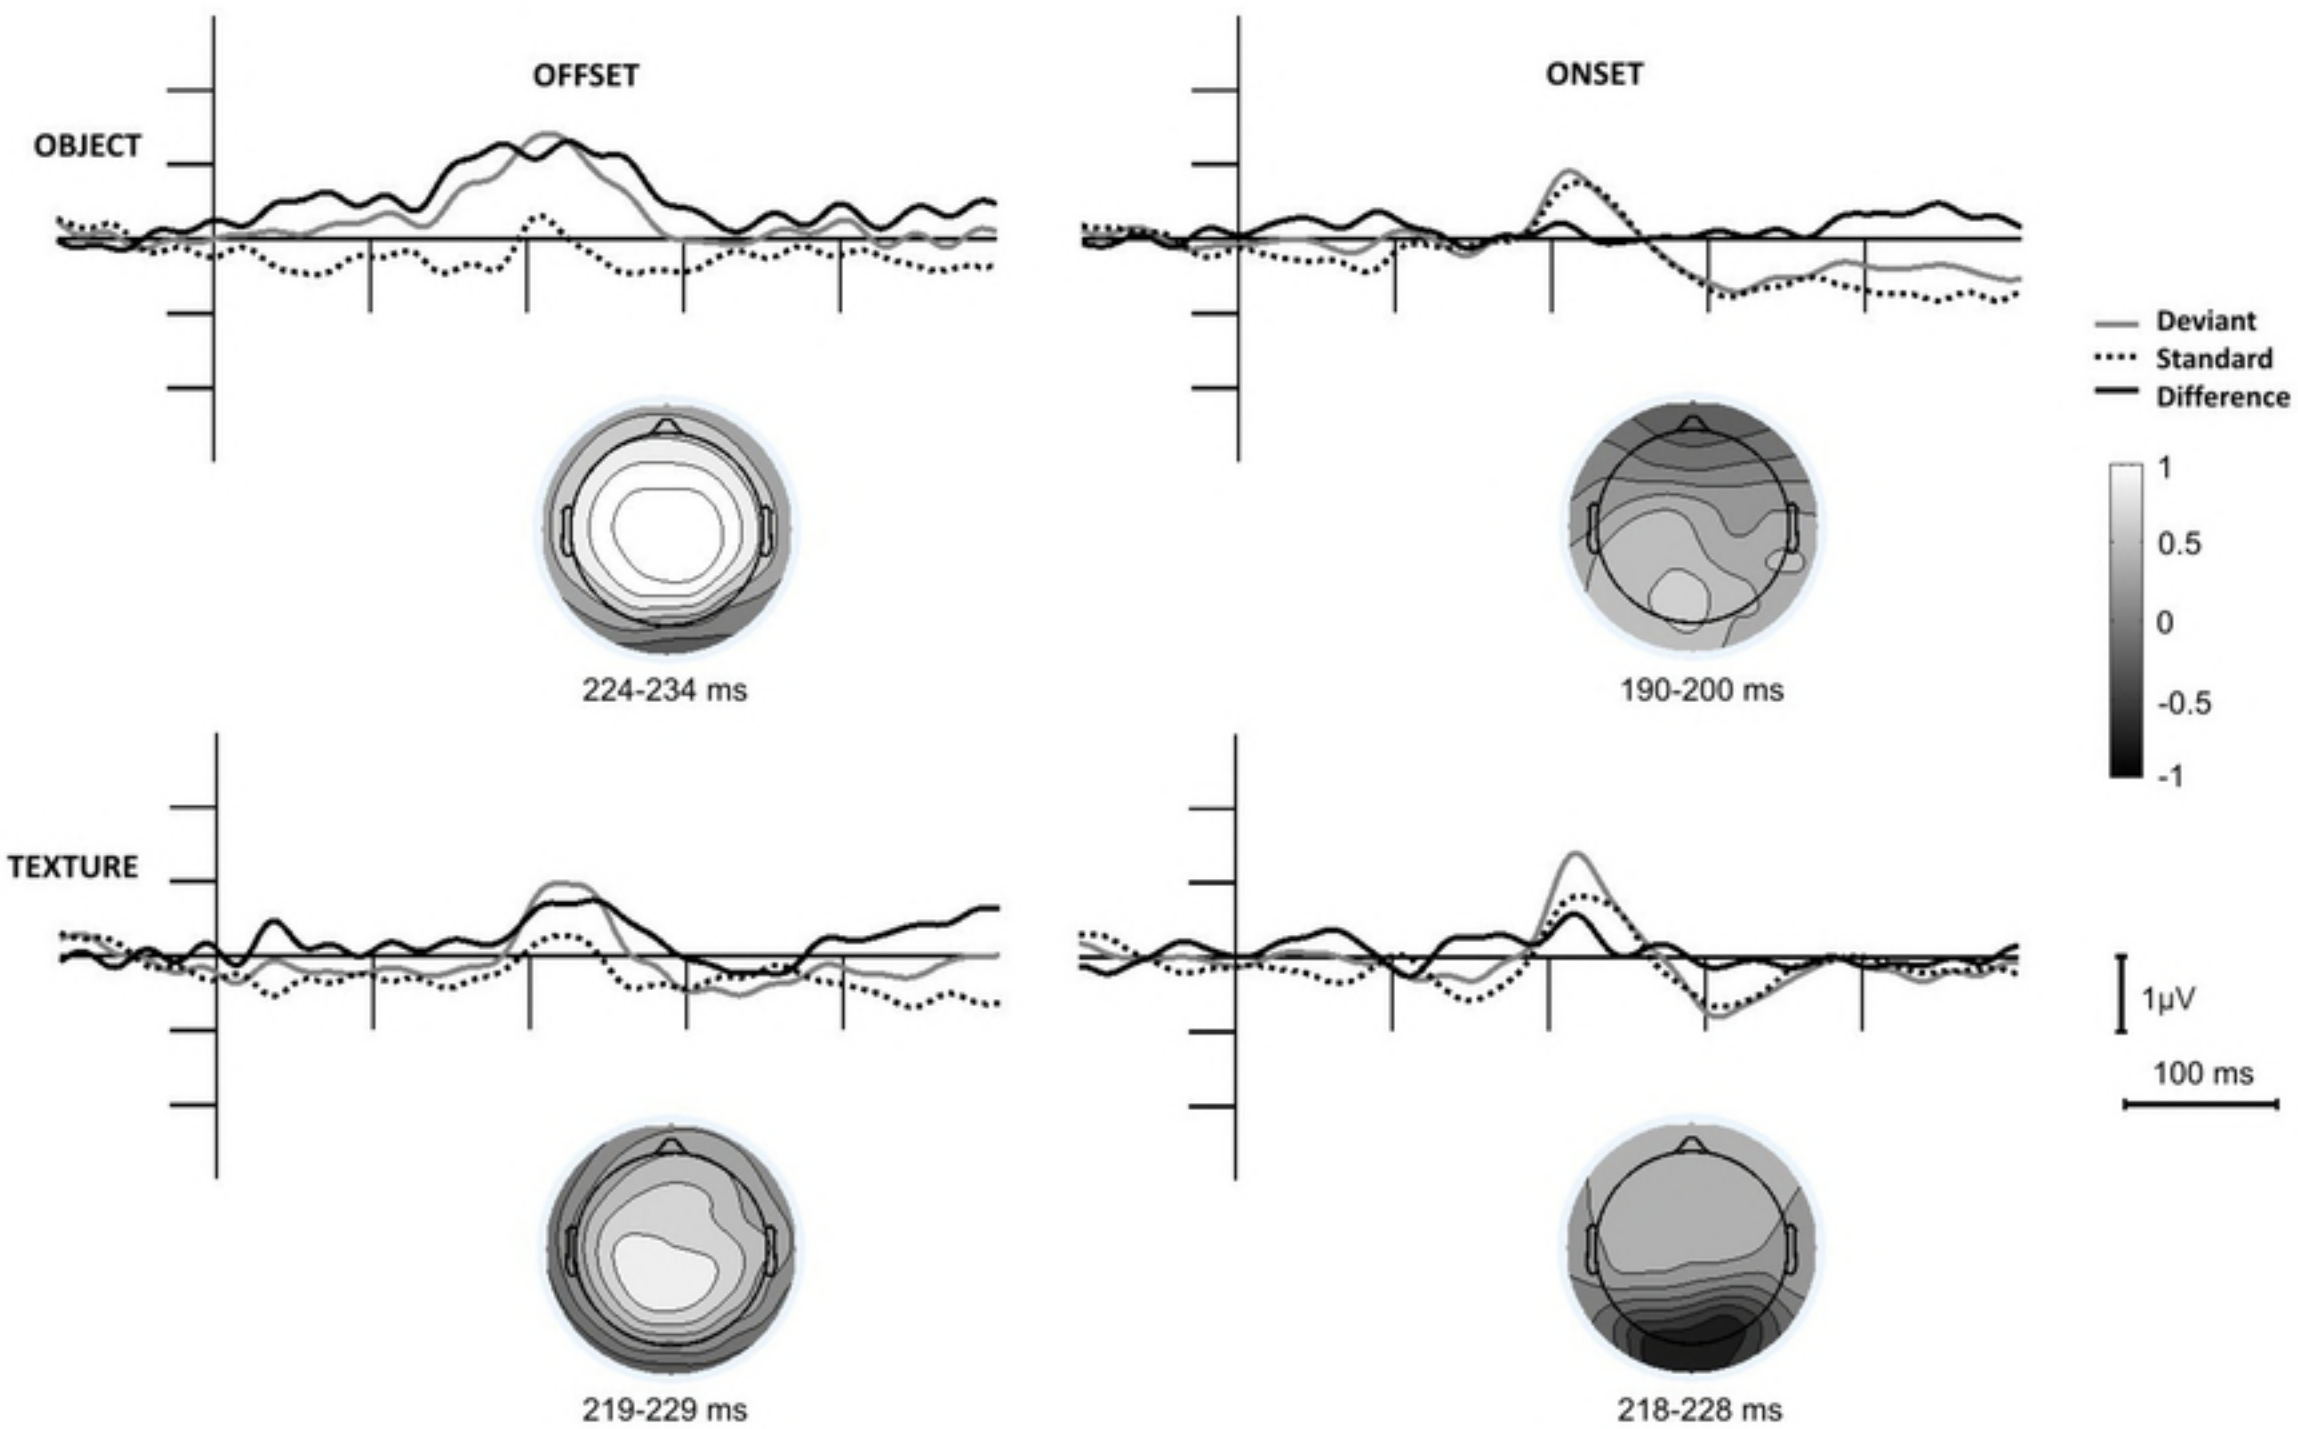

Figure3
